# Supplementary material
Source: publisher figshare collection journal article supplement (https://acs.figshare.com/ndownloader/files/8787415)
Supplement: Supplementary file 1 [file 8787415]

**Interfacial solid-phase chemical modification with Mannish reaction and Fe (III) chelation for designing the lignin-based spherical nanoparticle adsorbents for highly efficient removal of low concentration phosphate from water**

Xiaogang Luo<sup>1, 2\*</sup>, Chao Liu<sup>1</sup>, Jun Yuan<sup>1</sup>, Xingrong Zhu<sup>1</sup>, Shilin Liu<sup>3</sup>

<sup>1</sup>*Key Laboratory for Green Chemical Process of Ministry of Education; Hubei Key Laboratory for Novel Reactor and Green Chemistry Technology; School of Chemical Engineering and Pharmacy, Wuhan Institute of Technology, 693 Xiongchu Avenue, Hongshan District, Wuhan, 430073, China;*

<sup>2</sup>*Key Laboratory of Recycling and Eco-treatment of Waste Biomass of Zhejiang Province*

<sup>3</sup>*College of Food Science & Technology, Huazhong Agricultural University, Shizishan Street No. 1, Wuhan 430070, China*

The *Supporting Information Available* contains 2 pages, including 2 Figures  
Figures: Figure S1 and Figure S2

---

\* Corresponding author: Xiaogang Luo, Professor, Ph.D.

School of Chemical Engineering and Pharmacy, Wuhan Institute of Technology, 693 Xiongchu Avenue,  
Wuhan 430073, Hubei, China

Tel.: +86-139-86270668;

Email: xgluo0310@hotmail.com; xgluo@wit.edu.cn (X. Luo)

College of Food Science & Technology, Huazhong Agricultural University, Wuhan, Hubei, 430070,  
China

Tel.: +86-181-40521571

Email: slliu2013@mail.hzau.edu.cn (S. Liu).

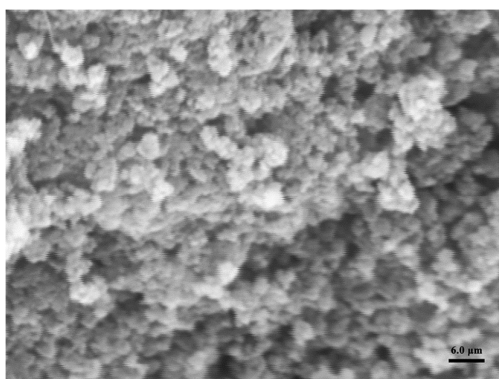

**Fig S1.** High-rate (20K times) scanning electron microscopic image of Fe-CL

High-rate (20K times) scanning electron microscopic (SEM) images confirmed that the particle size of the adsorbents was about 450 nm.

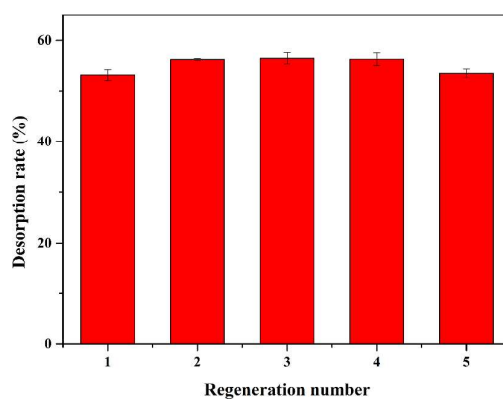

**Fig S2.** Cycle regeneration of batch experiments for Fe-CL (353 K, pH 7)

The desorption rate had been researched, even after five times, the desorption efficiency was also about 55% (Fig S2), this result can also confirm the strong bonding between Fe-CL and phosphate.<sup>1</sup>

## Reference

(1) Qiu, H.; Liang, C.; Zhang, X.; Chen, M.; Zhao, Y.; Tao, T.; Xu, Z.; Liu, G. Fabrication of a Biomass-Based Hydrous Zirconium Oxide Nanocomposite for Preferable Phosphate Removal and Recovery. *ACS Appl. Mater. Interfaces* **2015**, 7, 20835-20844.
